1 **Horizontal transmission of the entomopathogenic fungal isolate**  
2 **INRS-242 of *Beauveria bassiana* in emerald ash borer,**  
3 ***Agrilus planipennis* Fairmaire**

4 **Narin Srei <sup>1</sup>, Robert Lavallée <sup>2</sup> and Claude Guertin <sup>1,\*</sup>**

5 <sup>1</sup>Institut national de la recherche scientifique, Centre Armand-Frappier Santé Biotechnologie,  
6 531 des Prairies Blvd, Laval, QC, H7V 1B7, Canada

7 <sup>2</sup>Natural Resources Canada, Canadian Forest Service, Laurentian Forestry Center, 1055 rue  
8 du PEPS, Québec, QC, G1V 4C7, Canada

9 \* Correspondence: [claude.guertin@inrs.ca](mailto:claude.guertin@inrs.ca); Tel.: +1 (450) 687-5010

10 **Abstract**

11 Emerald ash borer (EAB), *Agrilus planipennis* Fairmaire, is an invasive and destructive beetle  
12 that causes extensive damage to ash trees in North America. The entomopathogenic fungus  
13 *Beauveria bassiana* is considered as an effective biological control agent for EAB adult  
14 populations. Using an autodissemination device with a fungal isolate of *B. bassiana*, our  
15 research aims to investigate the possibility of horizontal transmission of the fungal disease from  
16 infected to uninfected EAB adults during mating. Results show that the efficiency of fungal  
17 transmission is significantly related to the sex of EAB carrying the fungal pathogen. EAB males  
18 are the promising vector to transmit mycosis to their partners during mating. Results strengthen  
19 the potential of the fungal autodissemination device as a powerful biological strategy to control  
20 EAB populations.

21 **Keywords:** Emerald ash borer, Horizontal transmission, Autodissemination device,  
22 *Beauveria bassiana*

## 23 **Introduction**

24 Emerald ash borer (EAB), *Agrilus planipennis* Fairmaire, is an extremely invasive insect  
25 that is responsible for killing hundreds of million ash trees, *Fraxinus* spp., in urban and forest  
26 ecosystems of North America. EAB was first detected in 2002 in Detroit, Michigan (USA) and in  
27 Windsor, Ontario (Canada) after its introduction from northeastern Asia (Haack et al. 2002). To  
28 date, EAB is found in 35 American states and five Canadian provinces (Emerald ash borer  
29 information network). After hatching, EAB larvae tunnel through the bark and begin feeding the  
30 phloem and the cambium (Cappaert et al. 2005). The abundance of larval galleries disrupts the  
31 flow of nutrients and water within the tree and may cause the tree death in 3-4 years (Siegert et  
32 al. 2009).

33 Various strategies have currently developed to suppress EAB populations. These approaches  
34 include the use of systemic insecticides (Herms et al. 2014), parasitoids (Duan et al. 2012) and  
35 fungal control agents (Lyons et al. 2012). However, management of EAB is still challenging  
36 because of the beetle's cryptic behaviors. A fungal autodissemination device developed by  
37 Dr. Guertin and Dr. Lavallée has shown its potential in controlling EAB (Lyons et al. 2012).  
38 Results shown that most EAB adults who contacted the autodissemination chamber died after  
39 five days. This study builds upon previous research and aims to test the hypothesis that infected  
40 adults released from the autodissemination device can horizontally transmit the fungal pathogen  
41 to uninfected partners during mating.

## 42 **Materials and Methods**

### 43 **Emerald ash borer Collection**

44 During summer of 2017, six 12-funnel green Lindgren traps (Synergy Semiochemicals,  
45 Burnaby, BC, Canada) were suspended in the upper third of the canopy of ash trees located in  
46 Laval, QC, Canada (Long. 45.541309; Lat. -73.718103). EAB adults captured in the collecting  
47 jars were harvested daily. In the laboratory, male and female EAB were separated using  
48 morphological characters (Rodriguez-Saon et al. 2007). Insects were then reared in cages and  
49 fed with fresh ash leaves until their use in experiments.

### 50 **Fungal production**

51 The isolate INRS-242 of *Beauveria bassiana* (also known as INRS-CFL), which is an  
52 effective entomopathogen of *A. planipennis* adults (Lyons et al. 2012), was used in this study.  
53 This isolate is an endogenous fungus recovered by Lavallée and Guertin from the pine shoot  
54 beetle, *Tomicus piniperda* L., near Cookshire, QC, Canada. The fungal isolate is stored in 70%  
55 of glycerol at -80°C in the Fungal bank of the INRS-Armand-Frappier Santé and Biotechnologie,  
56 Laval, QC, Canada.

57 Autodissemination devices containing fungal coated-pouch were used in this experiment to  
58 inoculate EAB males and females. The production of the pouches was achieved as described  
59 by Srei (2017). Briefly, the INRS-242 isolate was first grown in Yeast Extract Peptone Dextrose  
60 broth (YPD, Alpha Bioscience Inc., Baltimore, MD, USA), in a rotary shaker (150 rpm) for four  
61 days at 25°C. The pouches (14.5 x 11 cm; fiberglass mosquito net) containing sterile pearled  
62 barley were then inoculated with the fungal conidial suspension before incubation for ten days  
63 in the growth chamber under controlled conditions (25°C, 70% of humidity and in the darkness).

## 64 **Experimental design**

65 A randomized block design with three replicates (blocks) was used to assess the  
66 transmission of the fungal disease from infected to uninfected EAB adults during mating  
67 behavior. Three treatments were randomly assigned to each block, with 20 EAB pairs per  
68 treatment. The first treatment represents the control pair, in which one uninfected male and one  
69 uninfected female were introduced in an arena (Petri Dishes 100 x 150 mm, Fisher Scientific,  
70 Ontario, Canada). For the second treatment, only the EAB male was inoculated with the fungus  
71 (IM+UF), whereas in the third treatment, just the EAB female was contaminated with the fungus  
72 (IF+UM). Three sterilized pouches without fungal isolate were used for the control treatments.  
73 For each infection treatment of each block, a fungal-coated pouch was employed once to  
74 inoculate EAB adults (Srei et al. 2017). Briefly, after walked on the fungal-coated pouch for 1  
75 min, each EAB male or female was transferred into the arena using sterilized tweezers. For all  
76 treatments, each EAB female was glued to the Petri dish surface using Evo-Stik (Evode Industry  
77 Ltd., Newtown, Ireland). This approach avoids the possibility of indirect horizontal transfer  
78 resulting from insect movement inside the arena. After being placed in the Petri dishes, the  
79 insects were observed for 18 hours. Two parameters were measured during the assay:  
80 presence of mating and fungal transmission. The fungal transmission was recorded as occurring  
81 when conidia were present on the ventral side of uninfected males, or on the dorsal part of  
82 uninfected females. In addition to these parameters, the subsequent mortality of EAB was also  
83 reported. After 18 hours, EAB males and females from each arena were individually transferred  
84 to a new Petri dish in which a fresh ash leaf was provided as food substrate. All Petri dishes  
85 were then incubated in the growth chamber at 25°C with 50% of relative humidity and 16:8 h  
86 photoperiod (light:dark). Mycosis was confirmed by the appearance of white muscardine on  
87 EAB cadavers. Both mortality of EAB adults and the presence of the muscardine were recorded  
88 daily for 14 days.

## 89 **Statistical analysis**

90 All statistical analyses were performed using the software R, version 3.4.3. The proportion  
91 of mated pairs and horizontal transmission efficacy of INRS-242 isolate of *B. bassiana* among  
92 EAB adults were assessed using an analysis of variance (ANOVA) to show significant  
93 differences between treatments. Means associated with different treatments were then coated  
94 using Duncan's multiple comparisons. Student's *t*-test was used to compare the fungal infection  
95 percentage of mated pairs and unmated pairs. For all statistical tests, the level of rejection was  
96 set at  $\alpha = 0.05$ .

## 97 **Results**

98 A significant difference in the percentage of EAB adults that mated was observed between  
99 treatments (ANOVA,  $df = 2$ ;  $F$  value = 6.75;  $p = 0.0291$ ) (Table 1). More precisely, no difference  
100 was recorded between the control group and IM+UF treatment. However, the percentage of  
101 insects that mated was significantly lower in IF+UM treatment. In both infection treatments  
102 (IM+UF and IF+UM), mycosis transmission was of 100% for mated beetles. On the other hand,  
103 no mycosis was observed in mated EAB pairs of control groups. As expected, the percentage  
104 of infected EAB was significantly higher in mated pairs than unmated pairs, with 66.7% and  
105 4.4% respectively ( $t$ -test = 3.6766;  $df = 16$ ;  $p = 0.002$ ). All infected EAB adults died within six  
106 days following the fungal contamination, and white muscardine was recorded on all  
107 contaminated individuals.

## 108 **Discussion**

109 Horizontal transmission by direct contact between fungal-infected and uninfected insects is  
110 a mechanism of natural dispersion of conidia that regulates insect population size (Steinkraus  
111 2006). This fungal transmission could occur from the time of initial contact during mating (Kreutz  
112 et al. 2004), as has previously observed in insect species including the eastern larch beetle,  
113 *Dendroctonus simplex* LeConte (Srei 2017), the European spruce bark beetle,

114 *Ips typographus* L. (Kreutz et al. 2004), the Mexican fruit fly, *Anastrepha ludens* Loew (Toledo  
115 et al. 2007), and the stem borer, *Busseola fusca* Fuller (Maniania et al. 2011). Under laboratory  
116 conditions, our results have demonstrated for the first time that an infected EAB adult can  
117 transmit *B. bassiana* isolate INRS-242 to an uninfected mate by contact during mating.  
118 Furthermore, our results shown that no fungal transmission was recorded on insects having no  
119 contact, which provides evidence that the confinement did not mediate mycosis transfer. For all  
120 EAB mated pairs, the average duration of mating was about 42 min (data not shown). This  
121 observation corroborates to that of Pureswaran and Poland (2009). Following the mortality of  
122 EAB adults and the appearance of muscardine, it is possible to confirm that the fungal dose  
123 transmitted from infected to uninfected EAB adults during mating is strong enough to cause the  
124 death of insects.

125 The efficiency of fungal transmission depends on the sex of the insect that carries the  
126 pathogen. Transmission of entomopathogenic fungus *Metarhizium anisopliae* (Metschn.)  
127 Sorokin within the populations of the Mediterranean fruit fly, *Ceratitis capitata* Wiedemann, was  
128 higher when males were carriers of the pathogen (Quesada-Moraga et al. 2008). In *D. simplex*,  
129 horizontal transmission of *B. bassiana* isolate INRS-242 was greatest when females were  
130 inoculated with the fungus (Srei 2017). Our results show that male-to-female transmission of  
131 the fungal isolate within EAB adults was higher than from female-to-male. One distinct  
132 characteristic of EAB males is their pubescence. This may facilitate the adhesion of conidia and  
133 could explain the difference observed in fungal transmission between infected males and  
134 infected females. Moreover, a preliminary experiment suggests that some EAB males can mate  
135 with at least two different females (data not shown). This observation suggests that increasing  
136 the proportion of contaminated males can be a valuable strategy for increasing the mortality  
137 rate of the adult EAB population. Adding another mortality factor to other biotic and abiotic  
138 factors could contribute to slow or to keep the EAB population at a lower level and may  
139 eventually reduce oviposition on ash trees.

140 **Acknowledgments:** We are grateful to Cynthia O'Hearn for technical support. This research  
141 was supported by 2016 GDG Environment/NRCan/INRS funding agreement to C.G. and R.L.



## 142 References

- 143 **Cappaert, D., D. G. McCullough, T. M. Poland, and N. W. Siegert. 2005.** Emerald ash borer  
144 in North America: a research and regulatory challenge. *Am. Entomol.* 51: 152-165.
- 145 **Duan, J. J., L. S. Bauer, K. J. Abell, and R. van Driesche. 2012.** Population responses of  
146 hymenopteran parasitoids to the emerald ash borer (Coleoptera: Buprestidae) in  
147 recently invaded areas in north central United States. *BioControl* 57: 199-209.
- 148 **Emerald ash borer information network.** <http://www.emeraldashborer.info/>. January 23rd,  
149 2019.
- 150 **Haack, R. A., E. Jendak, L. Houping, K. R. Marchant, T. R. Petrice, T. M. Poland, and H.**  
151 **Ye. 2002.** The emerald ash borer: a new exotic pest in North America. *Newsletter of the*  
152 *Michigan Entomological Society* 47: 1-5.
- 153 **Herms, D. A., D. G. McCullough, D. R. Smitley, C. S. Sadof, and W. Cranshaw. 2014.**  
154 **Insecticide options for protecting ash trees from emerald ash borer, Second ed.** USDA-  
155 NIFA North Central IPM Center.
- 156 **Kreutz, J., G. Zimmermann, and O. Vaupel. 2004.** Horizontal transmission of the  
157 entomopathogenic fungus *Beauveria bassiana* among the spruce bark beetle, *Ips*  
158 *typographus* (Col., Scolytidae) in the laboratory and under field conditions. *Biocontrol*  
159 *Sci. Technol.* 14: 837-848.
- 160 **Lyons, D. B., R. Lavallée, G. Kyei-Poku, K. Van Frankenhuyzen, S. Johny, C. Guertin, J.**  
161 **A. Francese, G. C. Jones, and M. Blais. 2012.** Towards the development of an  
162 autocontamination trap system to manage populations of emerald ash borer (Coleoptera:  
163 Buprestidae) with the native entomopathogenic fungus, *Beauveria bassiana*. *J. Econ.*  
164 *Entomol.* 105: 1929-1939.
- 165 **Maniania, N. K., E. Ouna, P. Ahuya, B. Frérot, A.-E. Félix, B. L. Ru, and P. A. Calatayud.**  
166 **2011.** Dissemination of entomopathogenic fungi using *Busseola fusca* male as vector.  
167 *Biol. Control* 58: 374-378.
- 168 **Pureswaran, D. S., and T. M. Poland. 2009.** The role of olfactory cues in short-range mate  
169 finding by the emerald ash borer, *Agilus planipennis* Fairmaire (Coleoptera:  
170 Buprestidae). *J. Insect Behav.* 22: 205-216.
- 171 **Quesada-Moraga, E., I. Martin-Carballo, I. Garrido-Jurado, and C. Santiago-Álvarez. 2008.**  
172 **Horizontal transmission of *Metarhizium anisopliae* among laboratory populations of**  
173 ***Ceratitis capitata* (Wiedemann) (Diptera: Tephritidae). *Biol. Control* 47: 115-124.**
- 174 **Rodriguez-Saon, C. R., J. R. Miller, T. M. Poland, K. T. M., G. W. Otis, T. Turk, and D. L.**  
175 **Ward. 2007.** Behaviors of adult *Agilus planipennis* (Coleoptera: Buprestidae). *The*  
176 *Great Lakes Entomologist* 40: 1-16.
- 177 **Siegert, N. W., D. G. McCullough, A. M. Liebhold, and F. W. Telewski. 2009.** Reconstruction  
178 of the establishment and spread of the emerald ash borer: dendrochronological analysis,  
179 pp. 70. In K. McManus and K. Gottschalk (eds.), 19th Annual Proceedings of the USDA  
180 Interagency Research Forum on Invasive Species. General Technical Report NRS-P-  
181 36.

- 182 **Srei, N. 2017.** Impact de la transmission horizontale d'un champignon entomopathogène chez  
183 le dendroctone du mélèze, *Dendroctonus simplex* LeConte (Coleoptera: Scolytinae).  
184 Philosophiæ doctor Thesis, INRS-Institut Armand-Frappier.
- 185 **Srei, N., R. Lavallée, and C. Guertin. 2017.** Susceptibility of *Dendroctonus simplex* to  
186 Hypocreales fungi: towards the development of a biological control strategy. J. Appl.  
187 Entomol. 141: 487-495.
- 188 **Steinkraus, D. C. 2006.** Factors affecting transmission of fungal pathogens of aphids. J.  
189 Invertebr. Pathol. 92: 125–131.
- 190 **Toledo, J., S. E. Campos, S. Flores, P. Liedo, J. F. Barrera, A. Villaseñor, and P. Montoya.**  
191 **2007.** Horizontal transmission of *Beauveria bassiana* in *Anastrepha ludens* (Diptera:  
192 Tephritidae) under laboratory and field cage conditions. J. Econ. Entomol. 100: 291-297.

193 **Table 1.** Percentage of mated pairs per treatment and the proportion of horizontal transmission  
194 of *B. bassiana* isolate INRS-242 recorded in adults of *A. planipennis* mated pairs. Control:  
195 male and female EAB were not exposed to the fungal isolate; IM+UF: fungal transmission  
196 between infected male and uninfected female EAB; and IF+UM: fungal transmission between  
197 infected female and uninfected male EAB. For each column, distinct letters indicate a  
198 significant difference (Duncan, n = 60,  $p < 0.05$ ).

199

| Treatments | Number of mated pairs (mean $\pm$ SD) | Fungal transmission between mated pairs (mean $\pm$ SD) |
|------------|---------------------------------------|---------------------------------------------------------|
| Control    | 73.3 $\pm$ 5.8 <sup>a</sup>           | 0.0 $\pm$ 0.0 <sup>a</sup>                              |
| IM+UF      | 73.3 $\pm$ 2.9 <sup>a</sup>           | 100.0 $\pm$ 0.0 <sup>b</sup>                            |
| IF+UM      | 58.3 $\pm$ 7.6 <sup>b</sup>           | 100.0 $\pm$ 0.0 <sup>b</sup>                            |

200
